# Supplementary material for: Critical threshold levels of DNA methyltransferase 1 are required to maintain DNA methylation across the genome in human cancer cells
Source: HighWire-hosted journal article supplement (doi:10.1101/gr.208108.116), 2017-02-23
Supplement: Supplemental_Methods.docx [file Supplemental_Methods.docx]

**Supplemental Methods:**

**Drug Treatment**

For 5-Aza-CdR (Sigma-Aldrich; St. Louis, Missouri) treatment, cells were treated with indicated doses for 48 hours. For 5-AZA (Sigma-Aldrich; St. Louis, Missouri) treatment, cells were treated for 0.5 uM of 5-AZA for 72 hours while in log-growth phase, changing the media and drug every 24 hours. Cells were harvested at 3, 7, 10, 14 days following initial application of 5-AZA.

**Antibodies**

The following antibodies were used: DNMT1 (Sigma, D9602; Abcam, ab92314); DNMT3A (Novus, IMG-268A); DNMT3B (described previously) (Rhee et al. 2000). UHRF1 (Millipore, MABE308); CDKN2A (Abcam, ab108349); αlpha tubulin and beta actin (Sigma).

### shRNA Knockdown and CRISPR Knockout

All lentiviral shRNA clones were ordered from Sigma. For CRISPR genome-editing, gRNAs were cloned into the lentiCRIPSR v2 vector (Addgene plasmid #52961) through the *BsmBI* site based on the protocol recommended by Addgene (Cambridge, MA, USA). The complete list of shRNA and gRNA sequences were shown in **Supplementary Table S2**. The production of lentivirus and cell infection were performed according to the pLKO.1 lentiviral vector protocol recommended by Addgene. Briefly, the lentiviral plasmid and packaging plasmids pMD2.G and psPAX2 (Addgene plasmid #12259 and #12260) were transfected into HEK-293T cells with Fugene 6 transfection reagent (Roche, Mannheim, Germany) and OPTI-MEM media (Invitrogen**,** Waltham, MA, USA). The lentivirus were harvested twice at day 4 and day 5. Virus were filtered with 0.35 um filter and stored at -80 °C. The lentiviral infection of target cells was performed in cell culture media with 8 ug/ml polybrene (Sigma H9268). Cells were selected with 1-2 ug puromycin from day 4. For lentiviral CRISPR knockout, cells were harvested at day 14.

**Bisulfite Sequencing**

### The primer for *CDKN2A* 5’ CpG island bisulphite sequencing was previously described (Myohanen et al. 1998). In HCT116 cells, one *CDKN2A* allele is wild-type and methylated and the other allele is unmethylated and has a 1-bp G insertion in exon1. Therefore, only the wild-type *CDKN2A* allele was included for data analysis. All PCRs were done using JumpStart Red Taq DNA Polymerase. PCR products were run on 1% agarose gels, and bands were excised using QIAquick Gel Extraction kit following the manufacturer's instructions (Qiagen). Purified bands were cloned using TOPO-TA cloning kit following the manufacturer's instructions (Invitrogen). Colonies were selected and grown overnight in Luria-Bertani medium containing ampicillin (100 μg/mL) with shaking at 37°C. Plasmid DNA was isolated using QIAprep Spin Miniprep kit following the manufacturer's instructions (Qiagen). Plasmids were screened for inserts by EcoRI digestion and sequenced using the M13 universal reverse primer (Invitrogen).

**Dot blot assay**

Genomic DNA was extracted using the Wizard Genomic DNA Purification Kit (Promega). DNA samples were diluted in TE buffer, denatured in 0.4 M NaOH/10 mM EDTA for 10 min at 95 °C, neutralized with equal volume of 2 M NH4OAc (pH 7.0), and spotted on a nitrocellulose membrane (pre-wetted in 1 M NH4OAc, pH 7.0) in two-fold serial dilutions using a Bio-Dot Apparatus Assembly (Bio-Rad). The blotted membrane was rinsed briefly in 2x SSC, air-dried, baked at 80 °C for two hours, blocked in 5% non-fat milk for 1 hour at room temperature, and incubated with anti-5mC antibody (Diagenode, C15200081, 1:2000) or anti-5hmc antibody (Active Motif 39769, 1:5000) at 4 °C overnight. After 3x 5 min washes in TBST, the membrane was incubated with HRP-conjugated anti-mouse IgG secondary antibody (GE, 1:5,000), incubated with ECL substrate and developed.​

### Genome-wide Methylation Analyses

Genome-wide DNA methylation is measured by Infinium HumanMethylation450 (HM450) BeadChip array (Illumina, Inc. San Diego, USA) according to the manufacturer’s instructions. Data were preprocessed and normalized using R (Team 2016) and the Bioconductor minfi package (Aryee et al. 2014). All probes were mapped to the human genome assembly GRCh37/hg19, and annotated using NCBI’s Reference Sequence (RefSeq) database and the UCSC CpG island track with a collection of Linux-based genomic tools including bedtools (Quinlan and Hall 2010) and HOMER (Heinz et al. 2010). The HM450 probes located within RefSeq transcripts and 1Kb away from transcription start sites (TSS) were defined as gene body probes. The enhancer regions in HCT116 cells were imputed based on the ChIP-seq data for H3K4me1 and H3K27ac in the same cell line downloaded from the ENCODE portal (Bernstein et al. 2012). H3K27ac and H3K4me1 peaks located within 1.5kb up- or-downstream of transcription start site (TSS) were excluded from the analyses to represent distal enhancers. The accession numbers for datasets: HCT116_H3K27ac (DCC accession: ENCFF000VCN), HCT116_H3K4me1 (DCC accession: ENCFF000VCF), DKO_H3K27ac (Blattler et al. 2014).

**Genome-wide Gene Expression Analyses**

Global gene expression profiles were analyzed with Agilent Human 4×44K expression arrays (Agilent Technologies, Santa Clara, CA, USA). Data were preprocessed and normalized using R and the Bioconductor limma package (Ritchie et al. 2015) for the subsequent analyses. Cross-platform normalization between Agilent v1 and v2 arrays (Figure 6F, 6G and 6H) was performed using the Bioconductor sva package (Surrogate Variable Analysis) (Leek et al. 2012).

**Supplemental Reference:**

Aryee MJ, Jaffe AE, Corrada-Bravo H, Ladd-Acosta C, Feinberg AP, Hansen KD, Irizarry RA. 2014. Minfi: a flexible and comprehensive Bioconductor package for the analysis of Infinium DNA methylation microarrays. *Bioinformatics* **30**: 1363-1369.

Bernstein BE, Birney E, Dunham I, Green ED, Gunter C, Snyder M. 2012. An integrated encyclopedia of DNA elements in the human genome. *Nature* **489**: 57-74.

Blattler A, Yao L, Witt H, Guo Y, Nicolet CM, Berman BP, Farnham PJ. 2014. Global loss of DNA methylation uncovers intronic enhancers in genes showing expression changes. *Genome Biol* **15**: 469.

Heinz S, Benner C, Spann N, Bertolino E, Lin YC, Laslo P, Cheng JX, Murre C, Singh H, Glass CK. 2010. Simple combinations of lineage-determining transcription factors prime cis-regulatory elements required for macrophage and B cell identities. *Molecular cell* **38**: 576-589.

Herman JG, Graff JR, Myohanen S, Nelkin BD, Baylin SB. 1996. Methylation-specific PCR: a novel PCR assay for methylation status of CpG islands. *Proc Natl Acad Sci U S A* **93**: 9821-9826.

Leek JT, Johnson WE, Parker HS, Jaffe AE, Storey JD. 2012. The sva package for removing batch effects and other unwanted variation in high-throughput experiments. *Bioinformatics* **28**: 882-883.

Myohanen SK, Baylin SB, Herman JG. 1998. Hypermethylation can selectively silence individual p16ink4A alleles in neoplasia. *Cancer Res* **58**: 591-593.

Quinlan AR, Hall IM. 2010. BEDTools: a flexible suite of utilities for comparing genomic features. *Bioinformatics* **26**: 841-842.

Rhee I, Bachman KE, Park BH, Jair KW, Yen RW, Schuebel KE, Cui H, Feinberg AP, Lengauer C, Kinzler KW et al. 2002. DNMT1 and DNMT3b cooperate to silence genes in human cancer cells. *Nature* **416**: 552-556.

Rhee I, Jair KW, Yen RW, Lengauer C, Herman JG, Kinzler KW, Vogelstein B, Baylin SB, Schuebel KE. 2000. CpG methylation is maintained in human cancer cells lacking DNMT1. *Nature* **404**: 1003-1007.

Ritchie ME, Phipson B, Wu D, Hu Y, Law CW, Shi W, Smyth GK. 2015. limma powers differential expression analyses for RNA-sequencing and microarray studies. *Nucleic Acids Res* **43**: e47.

Team RC. 2016. R: A language and environment for statistical computing. (ed. V R Foundation for Statistical Computing, Austria).
